# Supplementary material for: Characterization of SARS-CoV-2 Variants B.1.617.1 (Kappa), B.1.617.2 (Delta), and B.1.618 by Cell Entry and Immune Evasion
Source: PubMed Central journal article supplement (PMC9040861; doi:10.1128/mbio.00099-22), 2022-03-10

Supplemental Fig 1

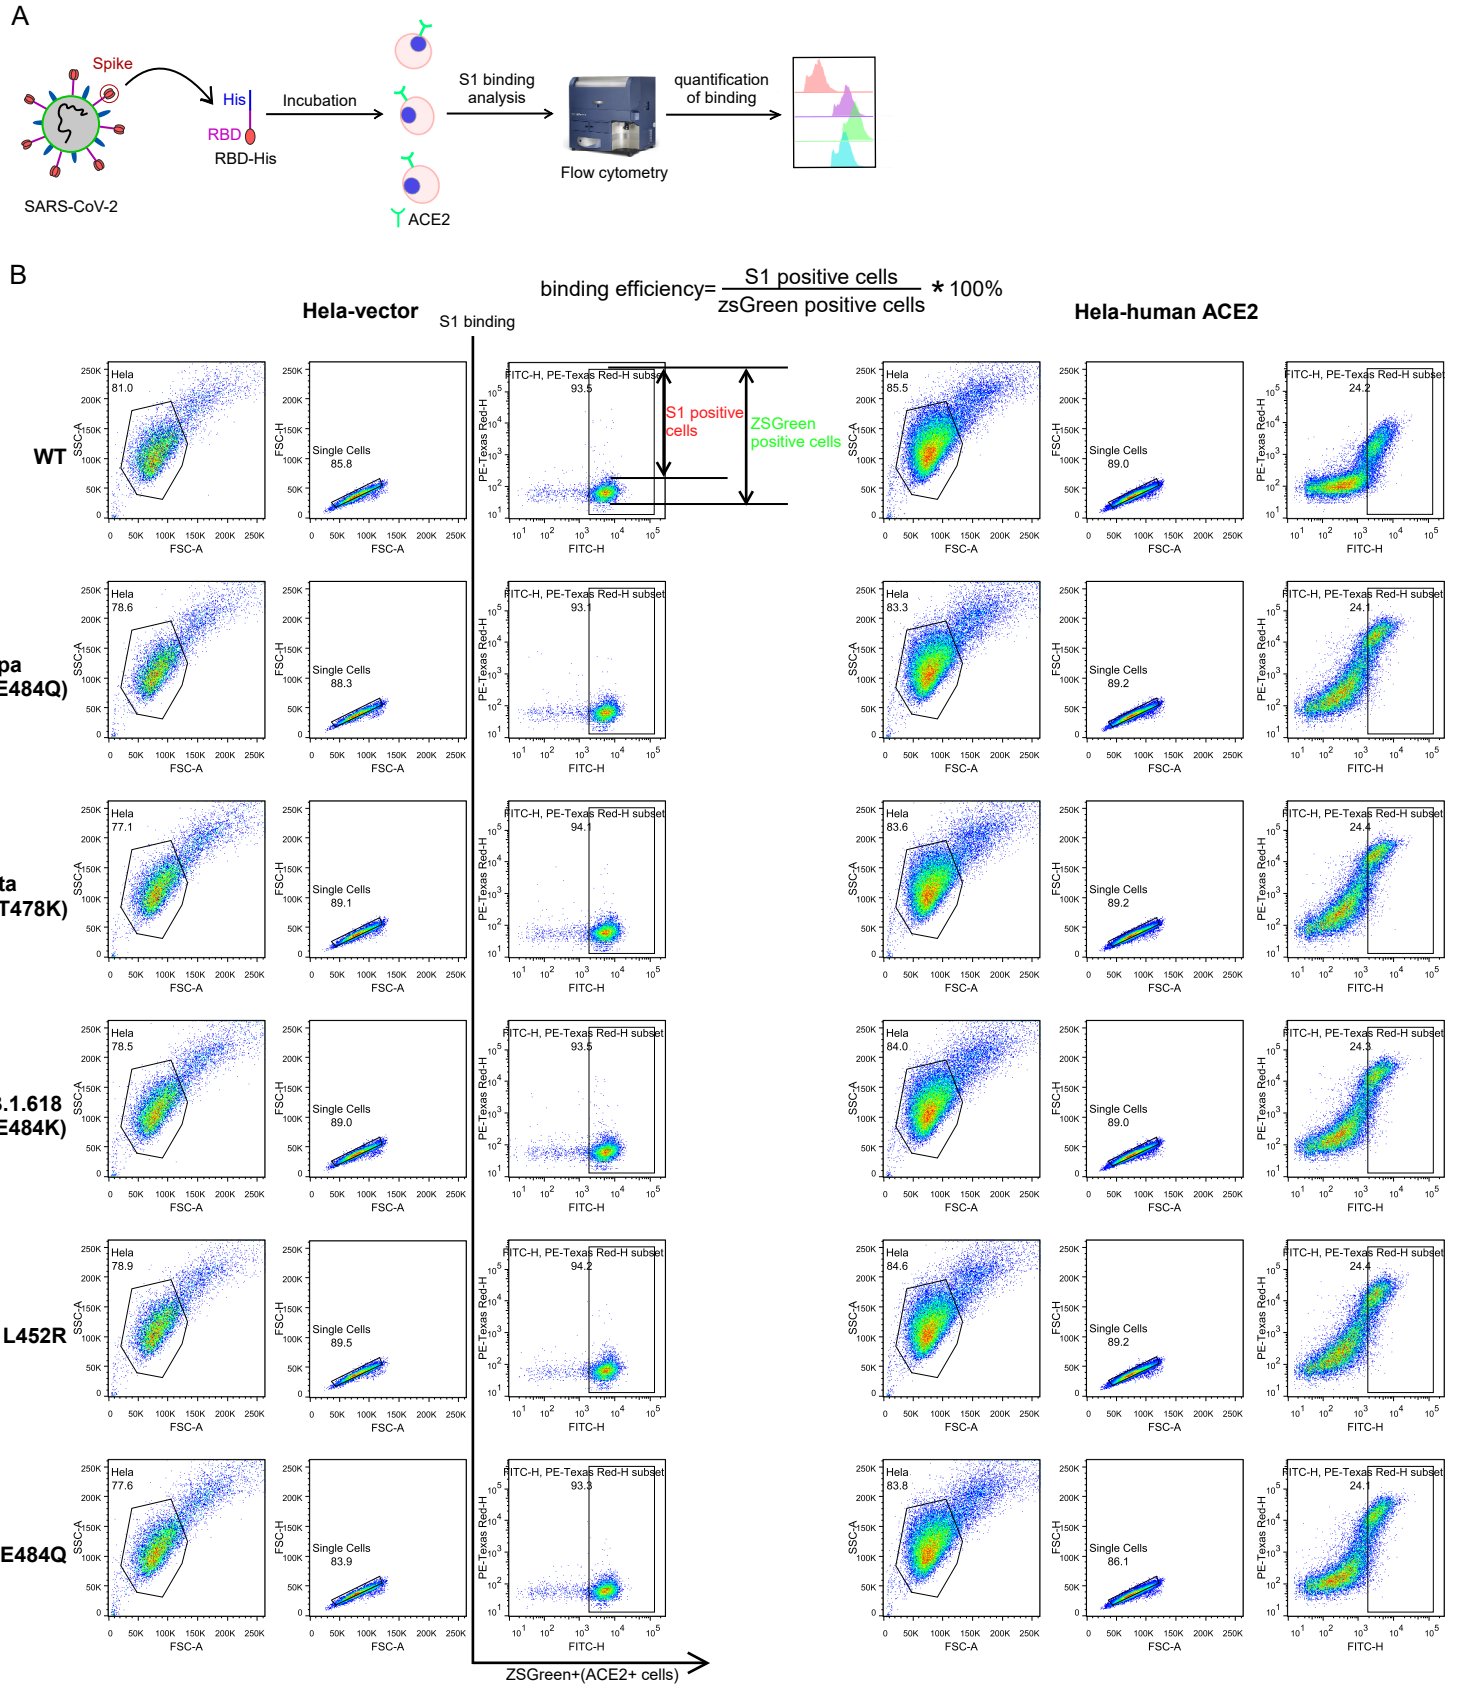

C

Hela-mouse ACE2

S1 binding

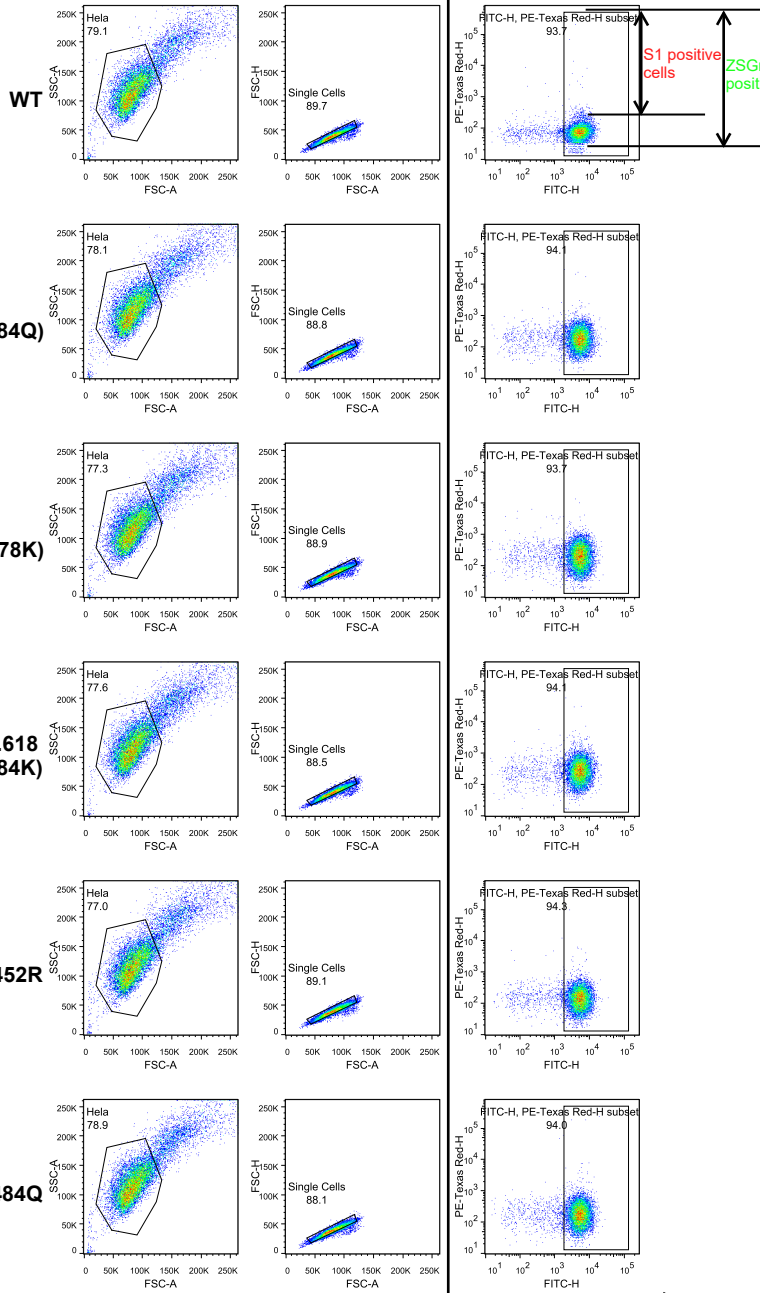

D

Hela-marmoset ACE2

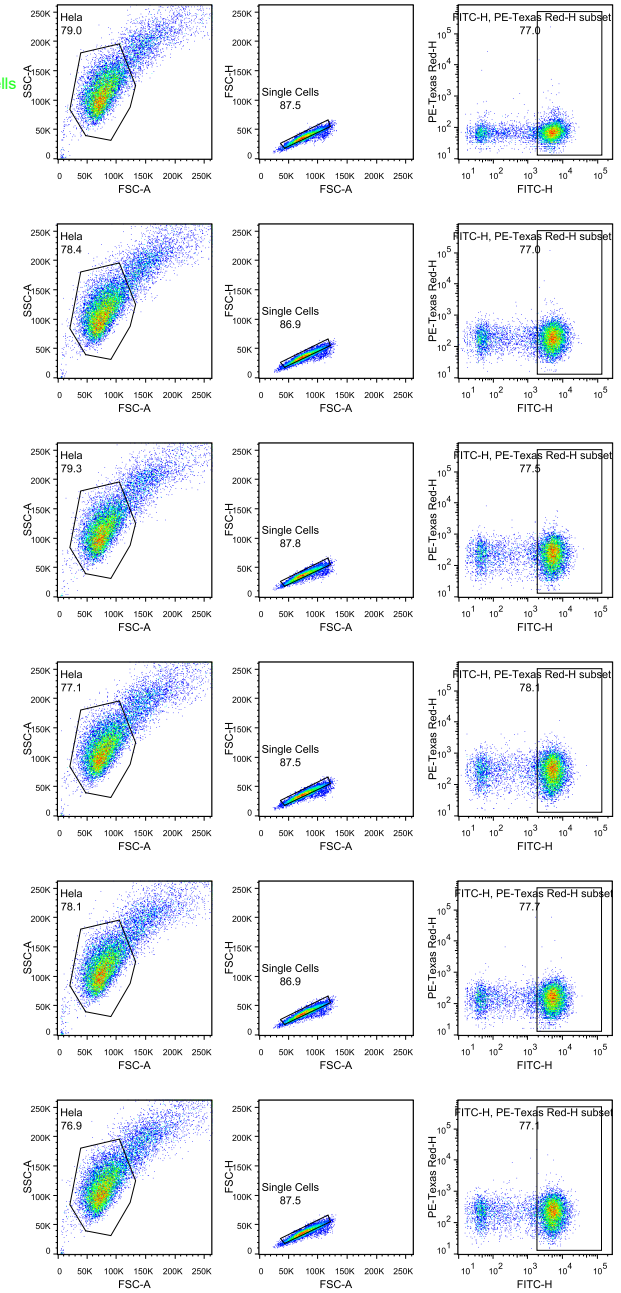

ZsGreen+(ACE2+ cells)

E

Hela-koala ACE2

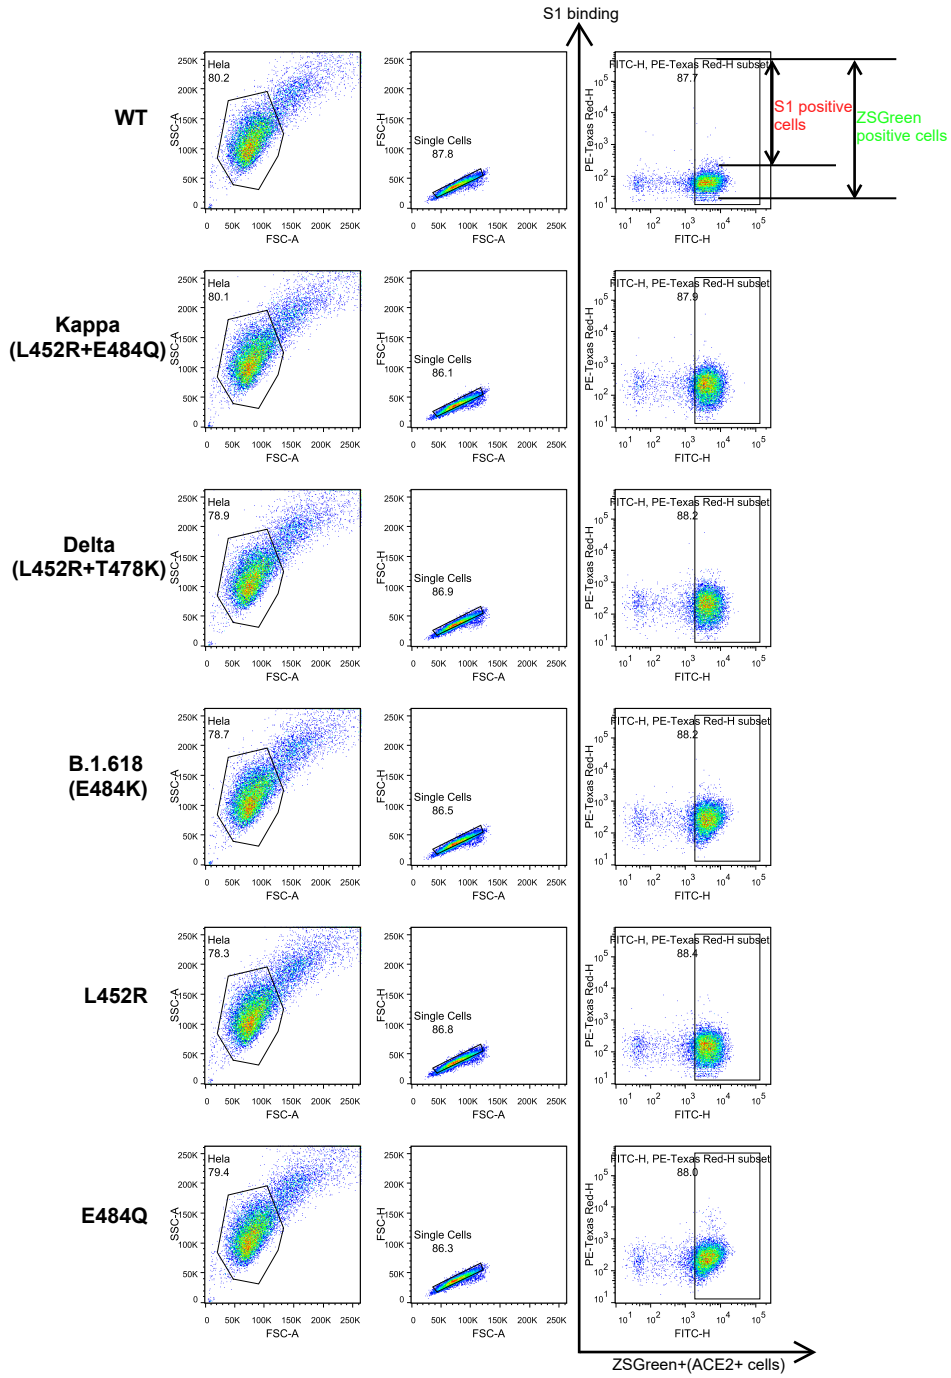

Supplement: mbio.00099-22-sf001.pdf [file mbio.00099-22-sf001.pdf]
